# Supplementary material for: Methanol oxidation on the Pt(321) surface: a theoretical approach on the role of surface morphology and surface coverage effects
Source: Royal Society of Chemistry journal article supplement (doi:10.1039/c9cp03291f), 2019-01-01
Supplement: c9cp03291f1.pdf [file c9cp03291f1.pdf]

## Supporting Information

### Methanol oxidation on the Pt(321) surface: a theoretical approach on the role of surface morphology and surface coverage effects

Gabriele Tomaschun<sup>a</sup> and Thorsten Klüner<sup>a,\*</sup>

<sup>a</sup> Department of Chemistry, Carl von Ossietzky University Oldenburg, 26129 Oldenburg, Germany

#### S1: CO adsorption geometries and adsorption energies on PtPd(321) and PtAu(321) surfaces

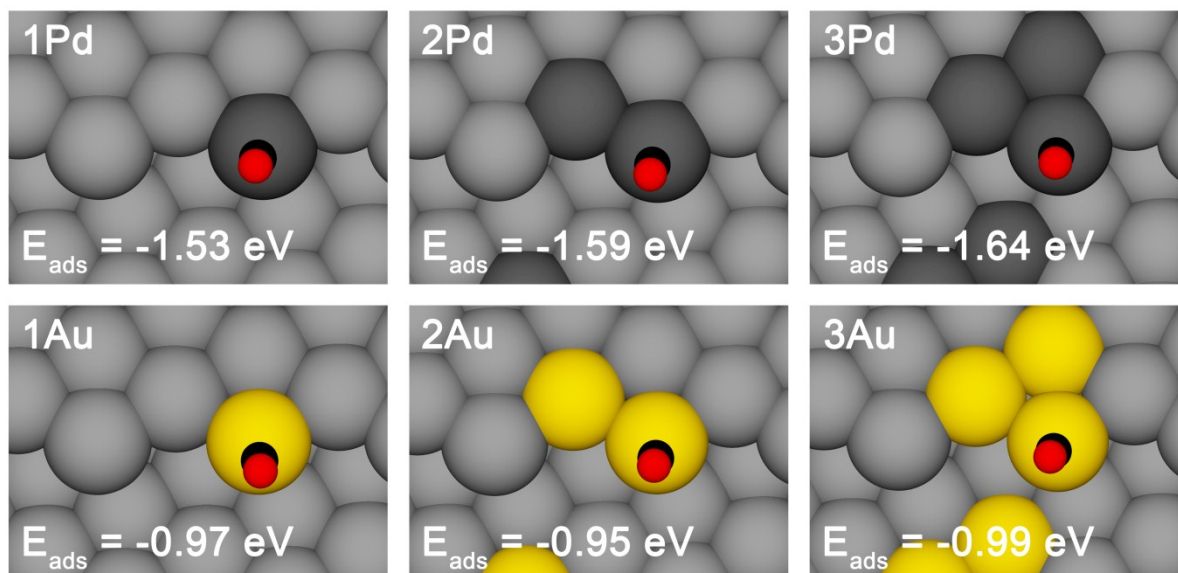

Figure S1: Geometries and adsorption energies of CO adsorbed on different PtPd(321) and PtAu(321) surfaces with 1, 2 and 3 Pt surface atoms replaced by Pd- and Au-atoms, respectively.

\* Corresponding authors E-mail address: thorsten.kluener@uni-oldenburg.de

## S2: Geometries of CO oxidation reactions on PtPd(321) and PtAu(321) surfaces

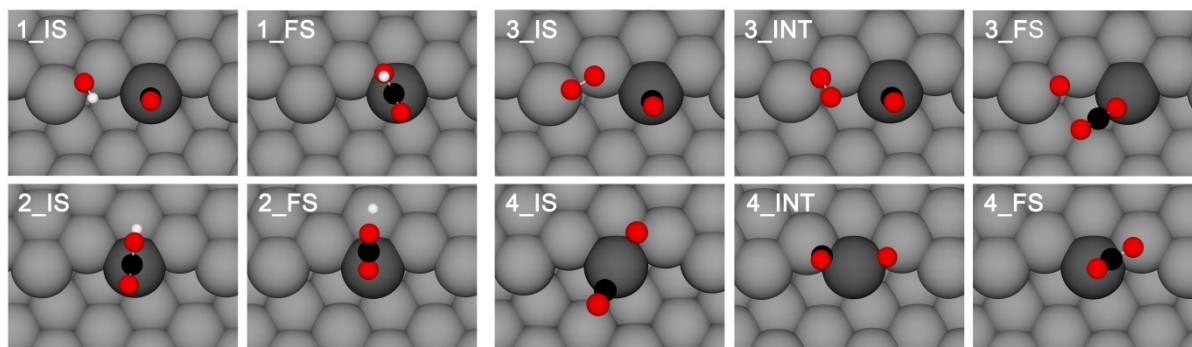

Figure S2: Initial (IS), intermediate (INT) and final (FS) states of CO oxidation with OH, O<sub>2</sub> and O on PtPd(321)-1Pd surface. The corresponding activation barriers can be found in Table 3.

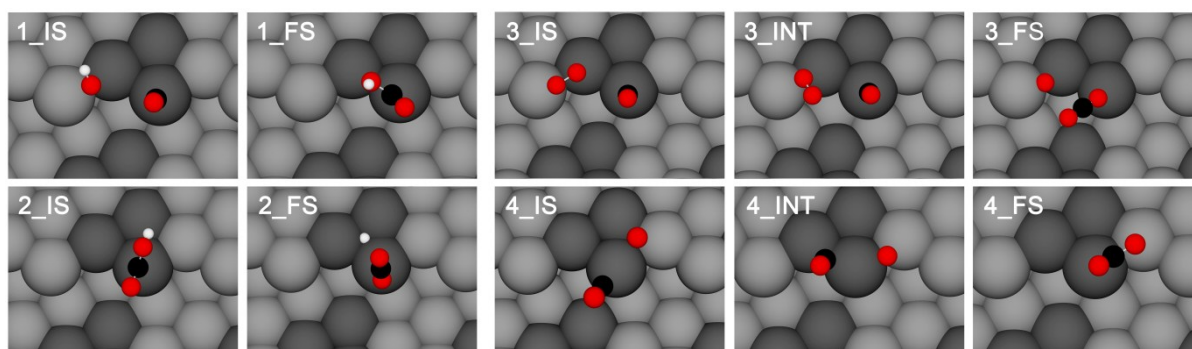

Figure S3: Initial (IS), intermediate (INT) and final (FS) states of CO oxidation with OH, O<sub>2</sub> and O on PtPd(321)-3Pd surface. The corresponding activation barriers can be found in Table 3.

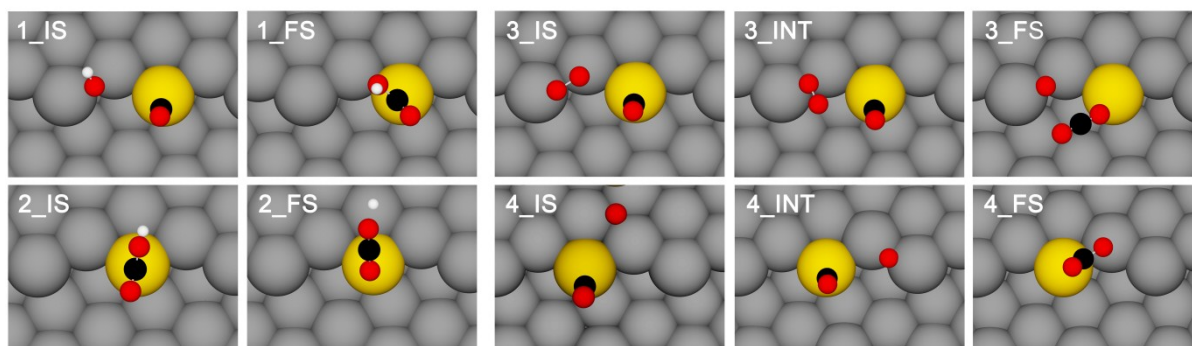

Figure S4: Initial (IS), intermediate (INT) and final (FS) states of CO oxidation with OH, O<sub>2</sub> and O on PtAu(321)-1Au surface. The corresponding activation barriers can be found in Table 3.

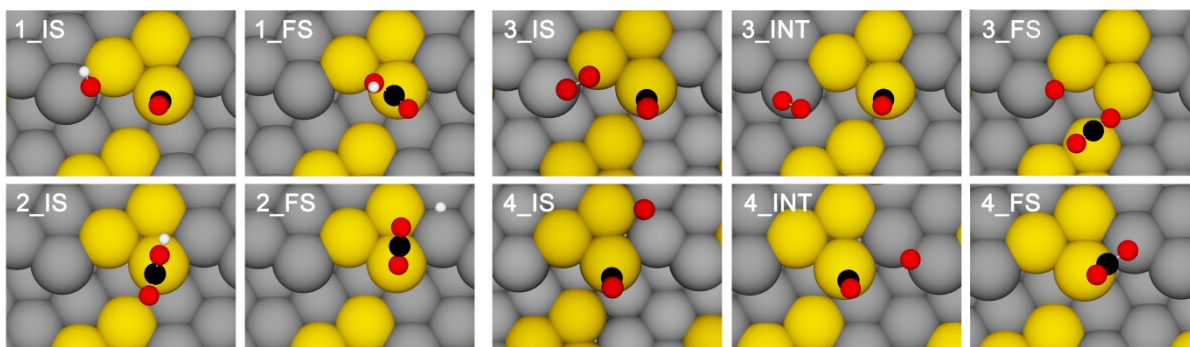

Figure S5: Initial (IS), intermediate (INT) and final (FS) states of CO oxidation with OH, O<sub>2</sub> and O on PtAu(321)-3Au surface. The corresponding activation barriers can be found in Table 3.

### S3: CO-path vs. non-CO path

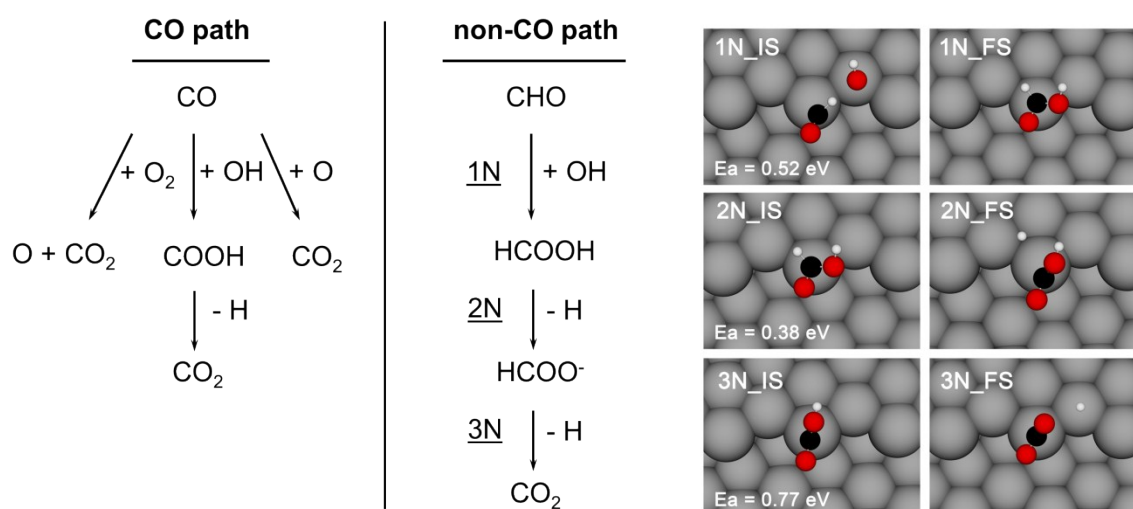

Figure S6: Left: Scheme of CO oxidation to CO<sub>2</sub> within the CO path. Right: Scheme and corresponding geometries of CO<sub>2</sub> generation within the non-CO pathway on Pt(321) surface. The respective activation energies ( $E_a$ ) are depicted for all three reaction steps (1N-3N).

**S4: OH coverage effect on RDS step (3N) of non-CO path**

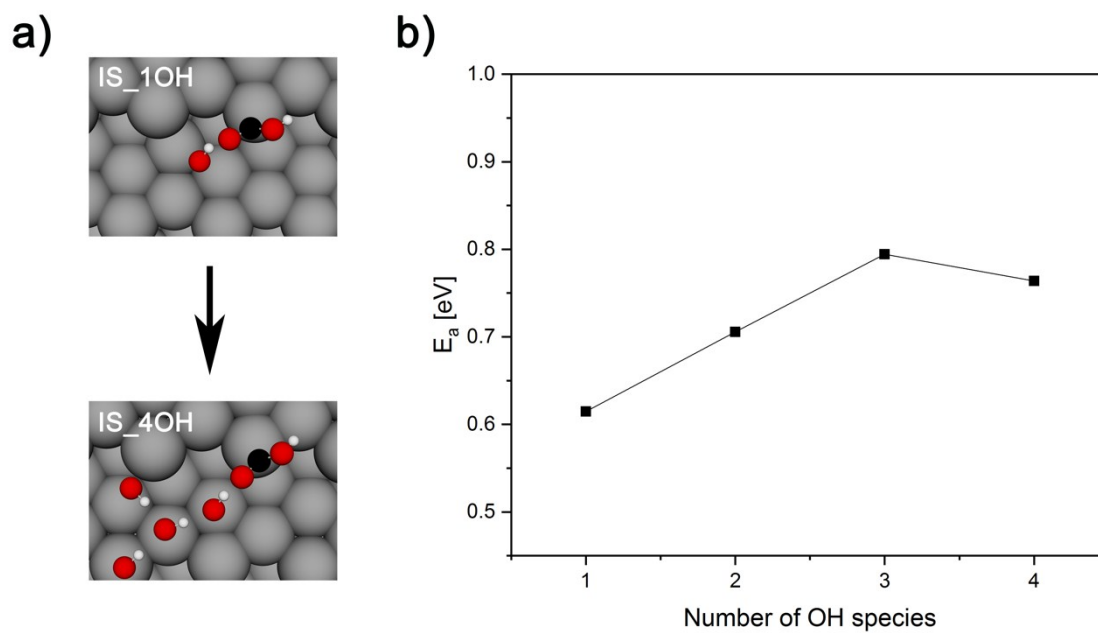

Figure S7: a) Geometries of the initial state (IS) of 3N reaction step with one (top) and four (bottom) OH molecules coadsorbed on the Pt(321) surface, respectively. b) Activation energies ( $E_a$ ) of 3N reaction step (non-CO path) at different coverage of OH species coadsorbed on the Pt(321) surface.
